# Supplementary material for: Arsenic-containing hydrocarbons: natural compounds in oil from the fish capelin, Mallotus villosus
Source: Royal Society of Chemistry journal article supplement (doi:10.1039/b808049f), 2008-01-01
Supplement: b808049f.pdf [file b808049f.pdf]

IonSpec HiResMALDI

File: c:\ionspec\ftdata\KB080311.003

MDWF19 on 2,5-dhb m/z=350

Date: 11-MAR-2008  
Time: 17:11:27  
Mode: Positive  
Scans: 10  
Scale: 42.8720  
(Peak Match)

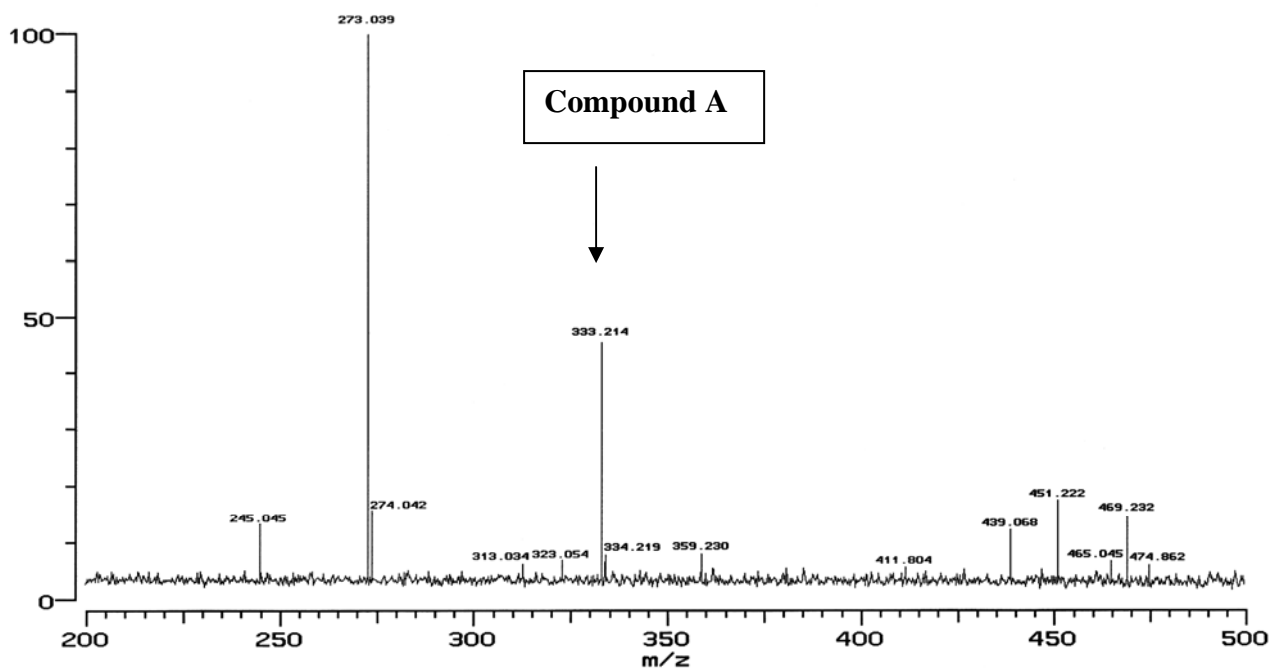

Fraction 19 from preparative reversed-phase HPLC

**Compound A** ( $C_{17}H_{37}AsO$  (calcd for  $[M+H]$  333.2134; found 333.2139;  $\Delta m = 1.5$  ppm)

 **IonSpec HiResMALDI**  
File: c:\ionspec\ftdata\KB080311.001  
MDWF18 on 2,5-dhb m/z=350

Date: 11-MAR-2008  
Time: 15:44:12  
Mode: Positive  
Scans: 5  
Scale: 99.4221  
(Peak Match)

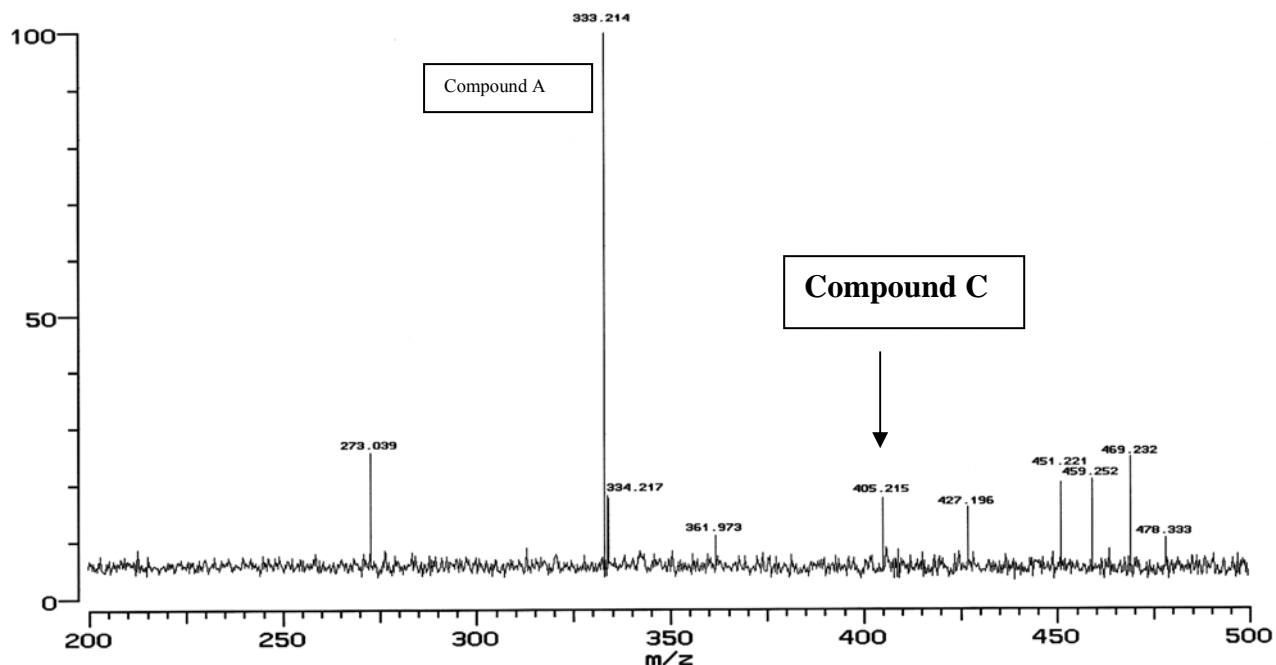

Fraction 18 from preparative reversed-phase HPLC

Compound C (and compound A)

**Compound C:**  $C_{23}H_{37}AsO$  (calcd for  $[M+H]$  405.2134; found 405.2149;  $\Delta m = 3.7$  ppm).

 **IonSpec HiResMALDI**  
File: c:\ionspec\ftdata\KB080311.000  
MDWF20 on 2,5-dhb m/z=350

Date: 11-MAR-2008  
Time: 15:35:29  
Mode: Positive  
Scans: 5  
Scale: 28.5868  
(Peak Match)

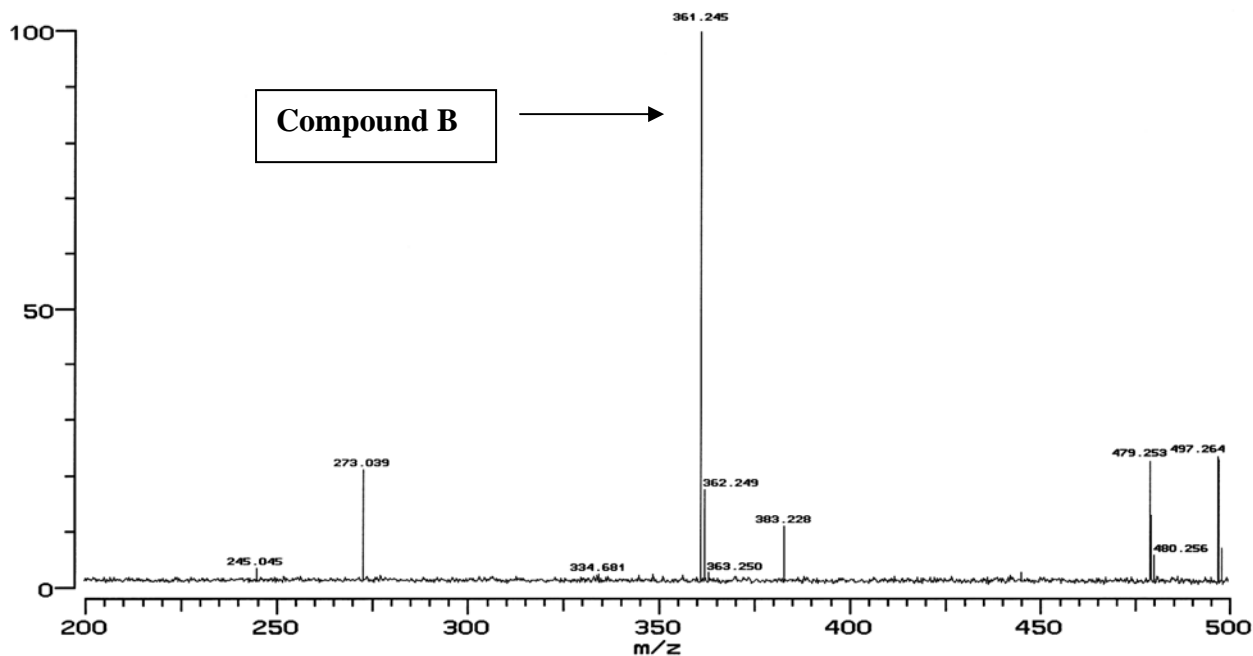

Fraction 20 from preparative HPLC

**Compound B:**  $C_{19}H_{41}AsO$  (calcd for  $[M+H]$  361.2446; found 361.2450;  $\Delta m = 1.1$  ppm).
